# Supplementary material for: Genome-wide identification of the Liriodendron chinense WRKY gene family and its diverse roles in response to multiple abiotic stress
Source: PubMed Central journal article supplement (PMC8744262; doi:10.1186/s12870-021-03371-1), 2022-01-10

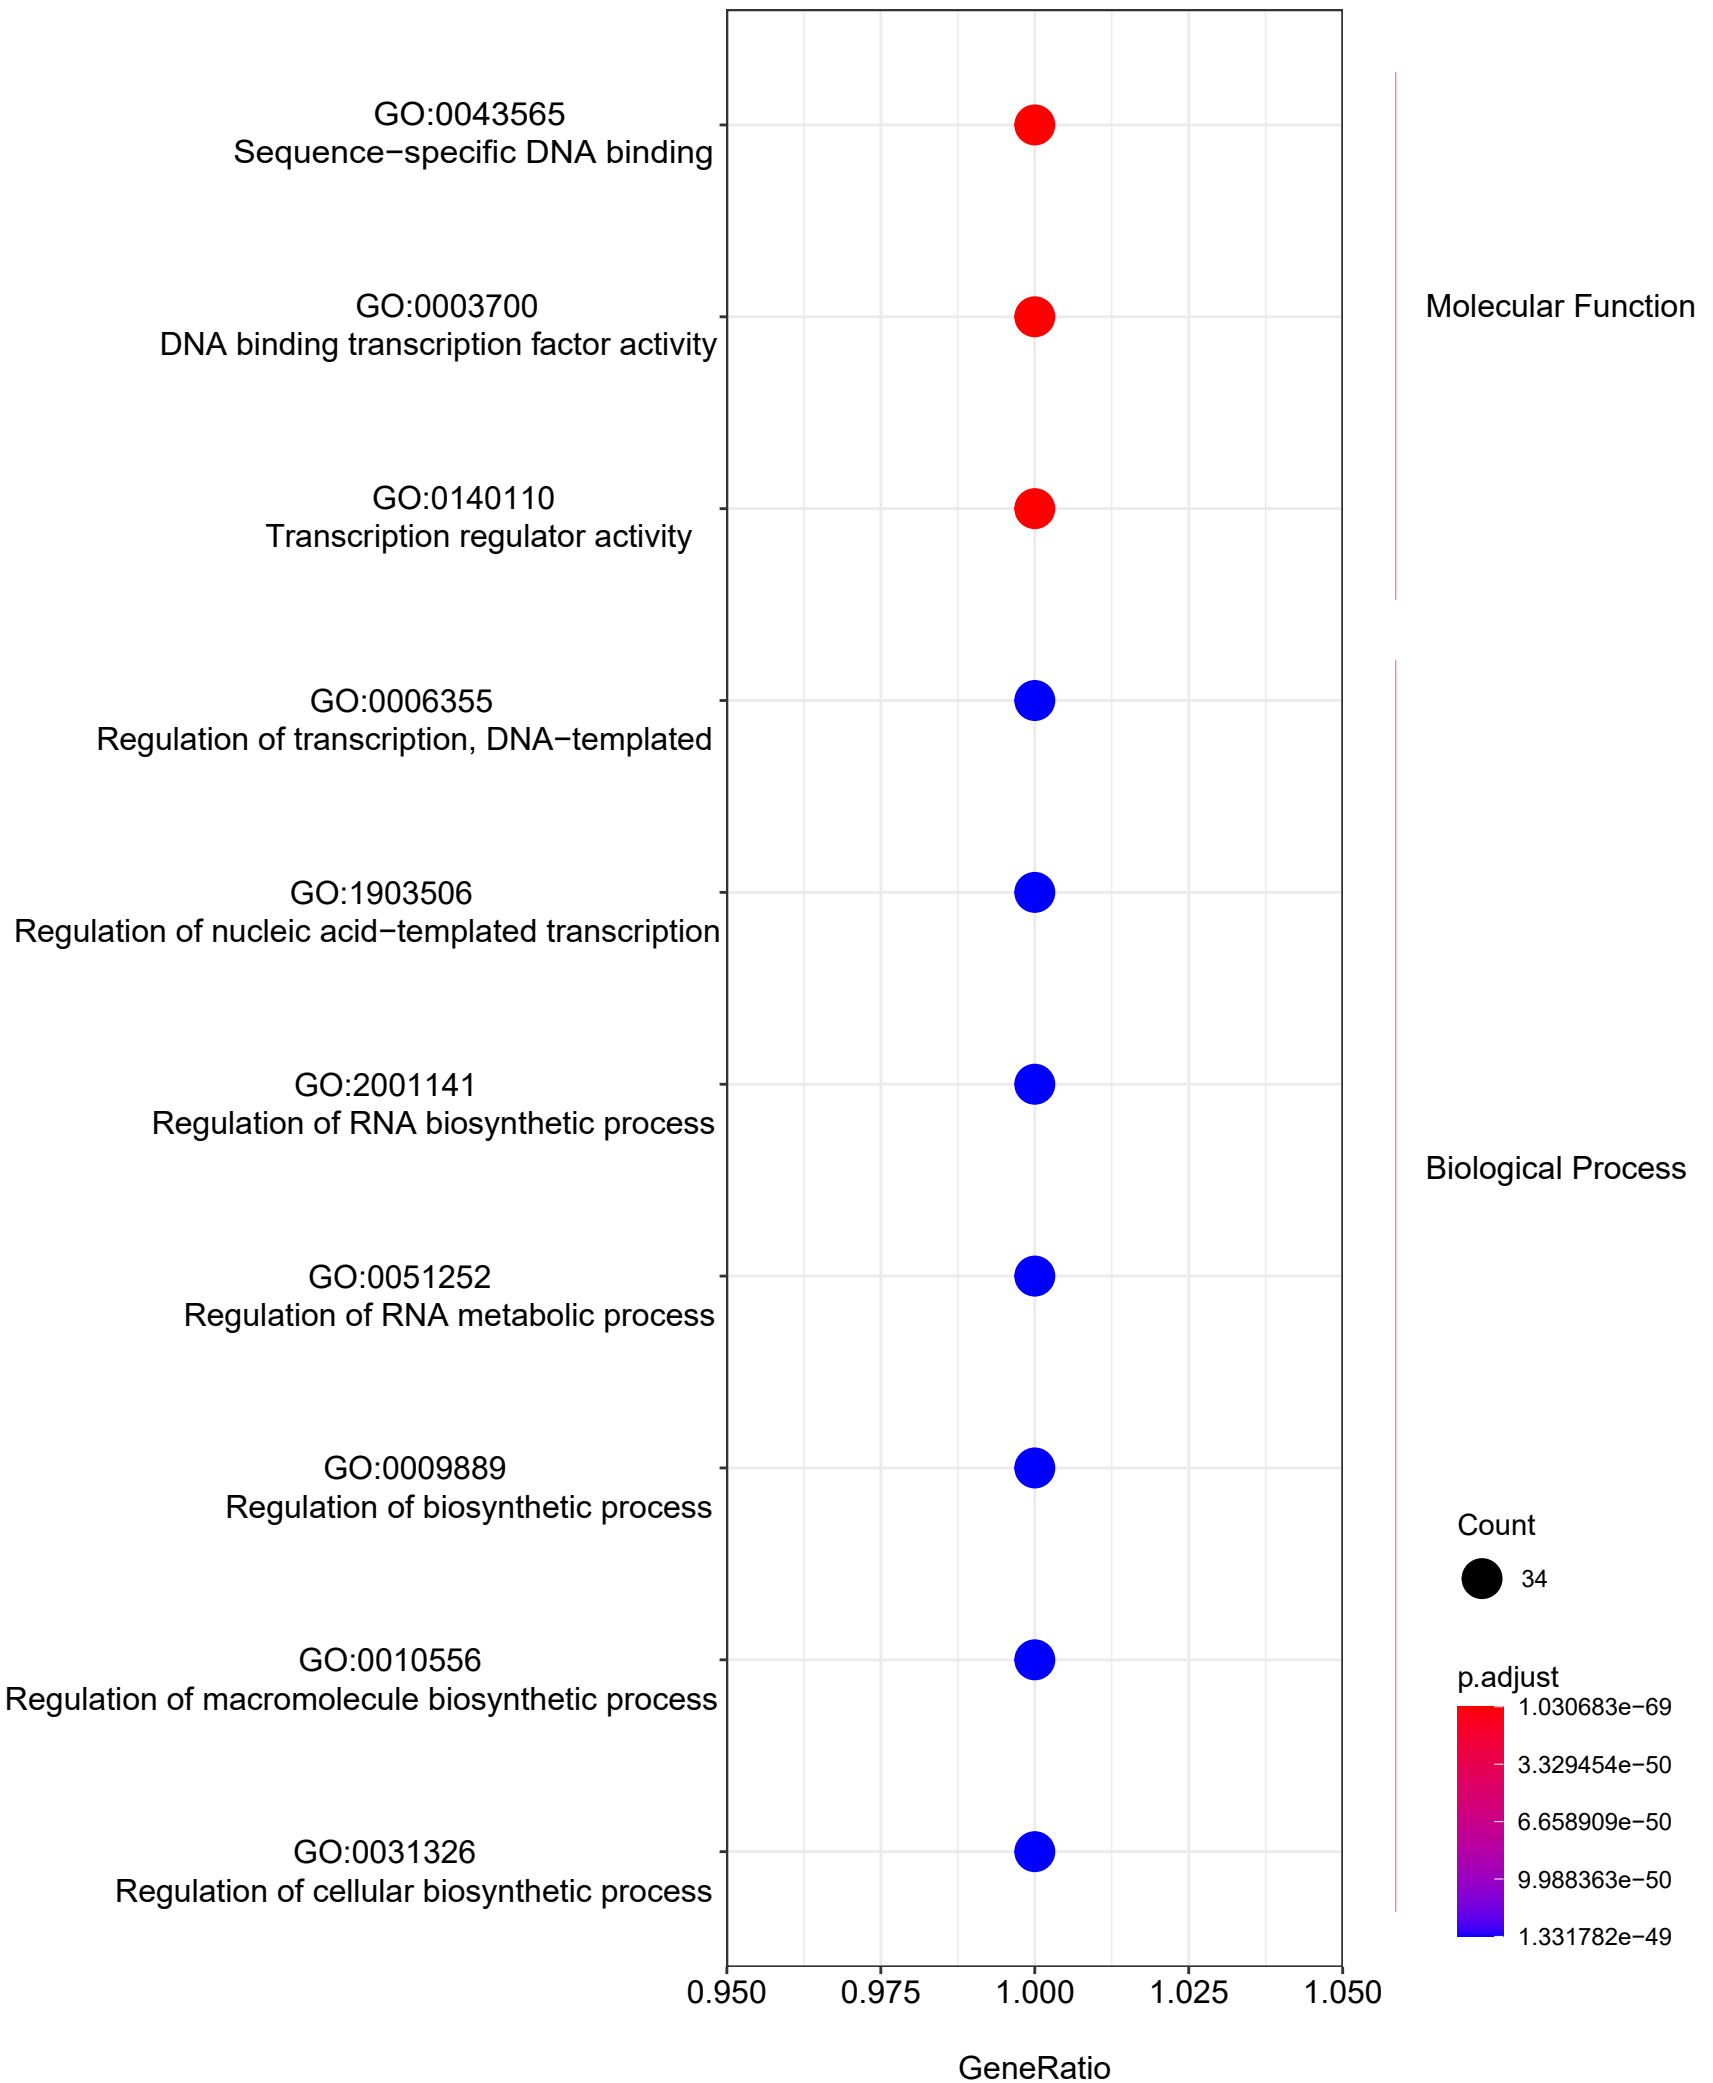

Supplement: 12870_2021_3371_MOESM8_ESM.pdf [file 12870_2021_3371_MOESM8_ESM.pdf]
