# Supplementary material for: Genome-wide identification of the Liriodendron chinense WRKY gene family and its diverse roles in response to multiple abiotic stress
Source: PubMed Central journal article supplement (PMC8744262; doi:10.1186/s12870-021-03371-1), 2022-01-10

Group II-a, II-b

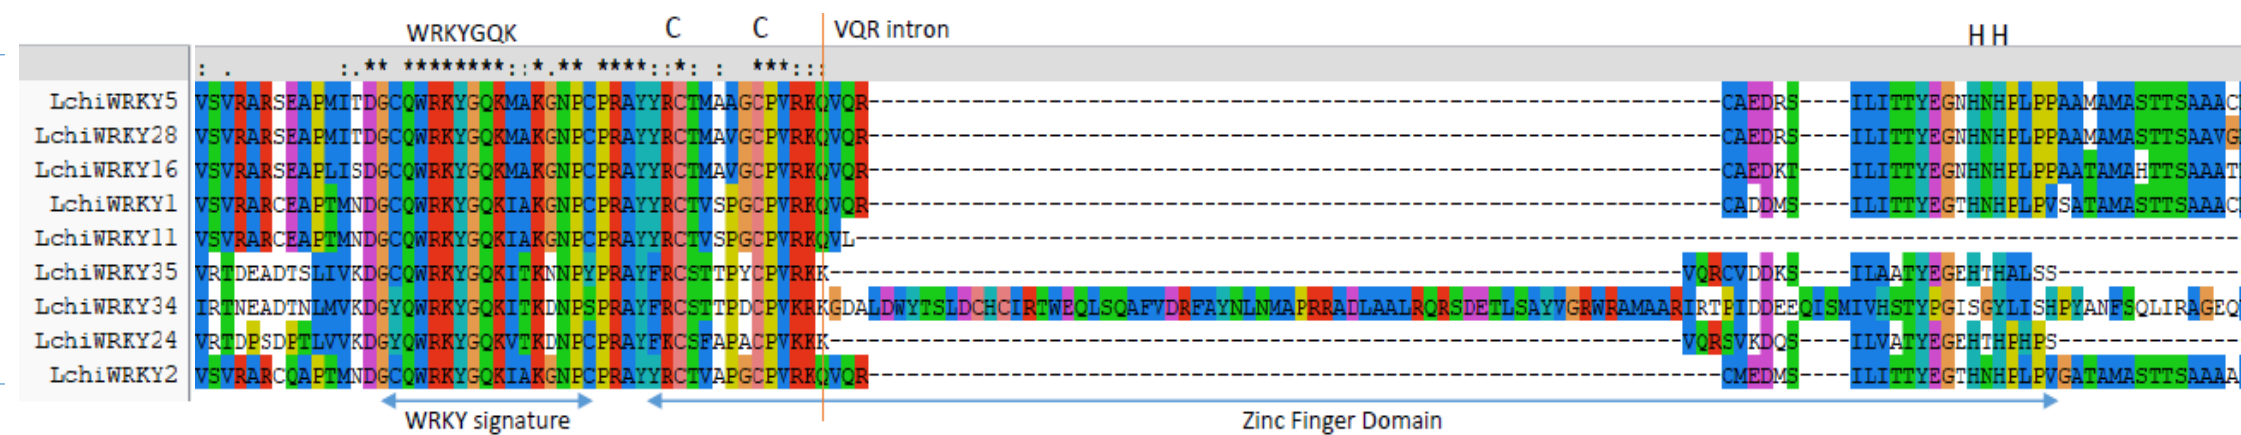

Group I, II-c,  
II-d, II-e, III

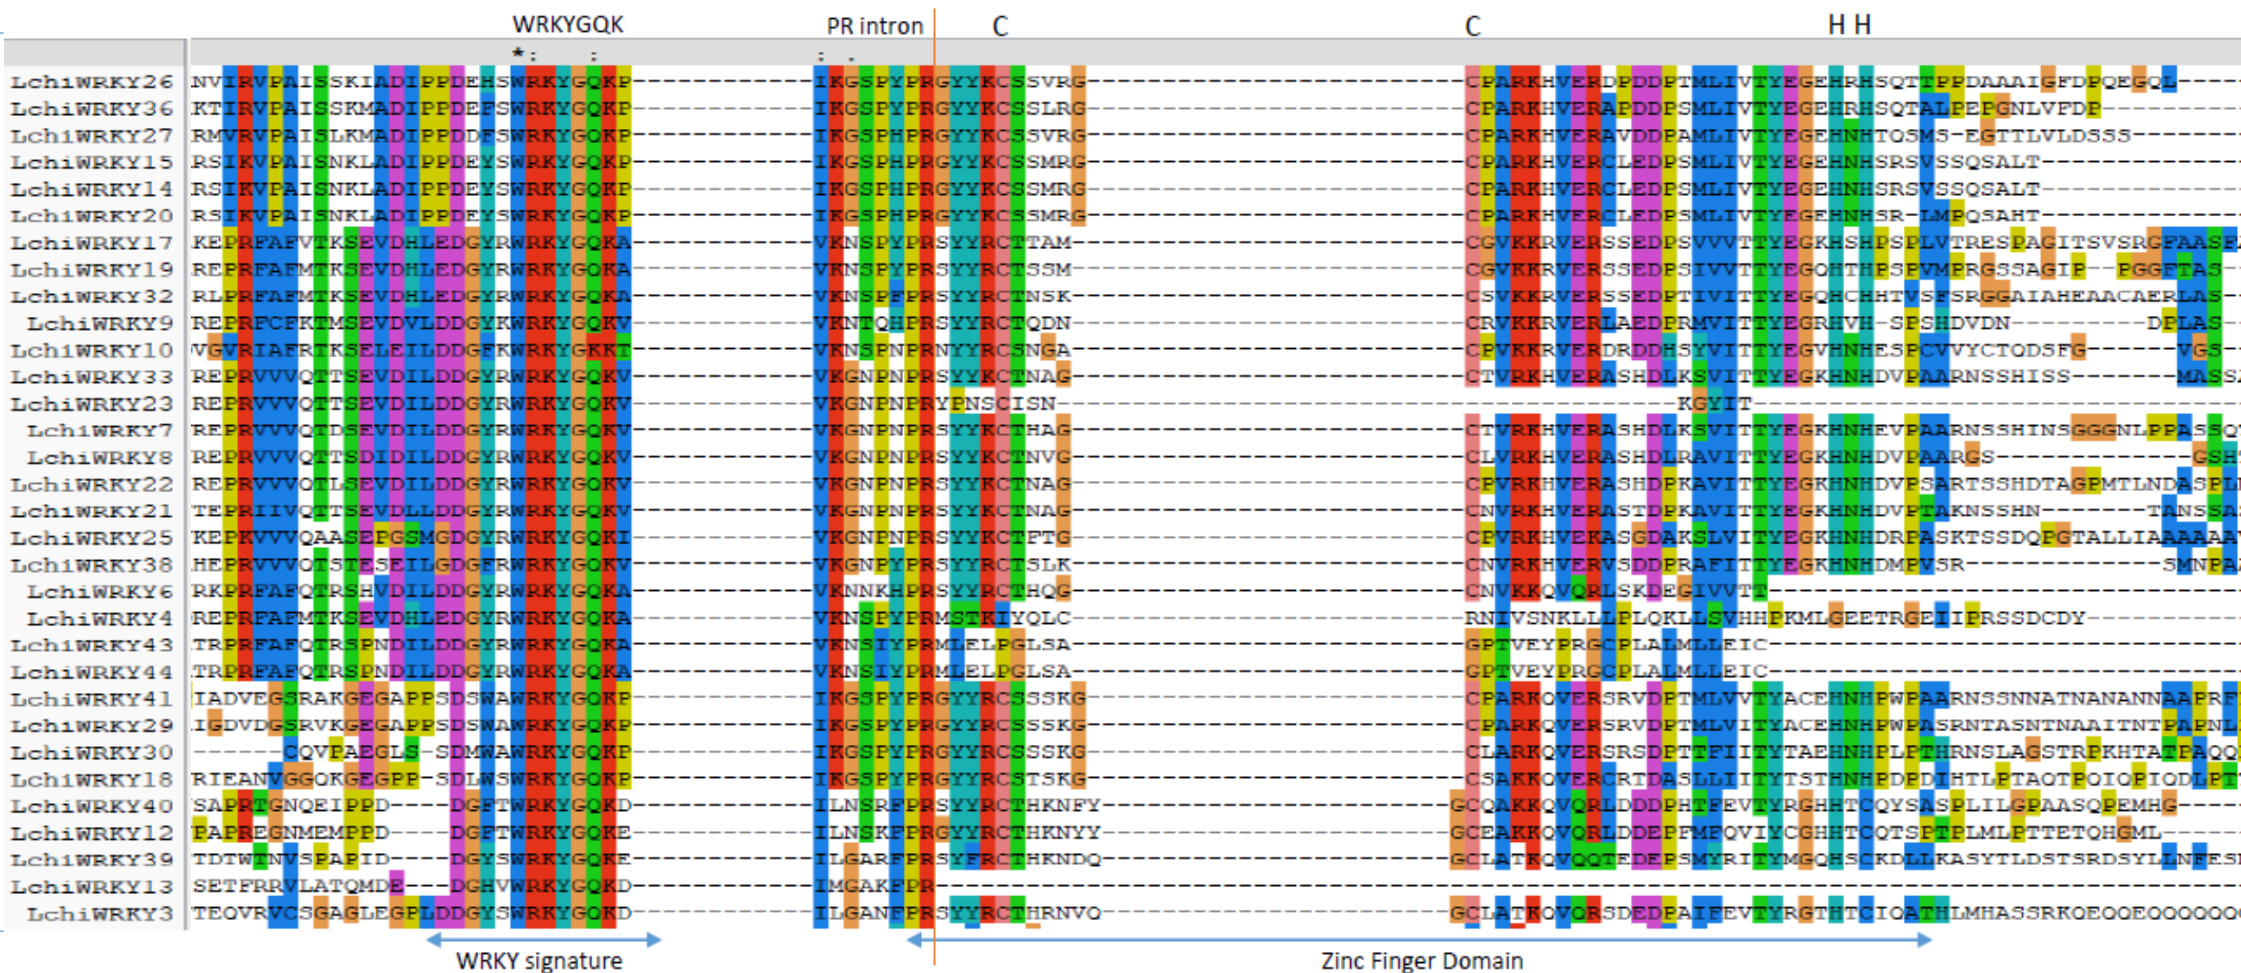

Supplement: 12870_2021_3371_MOESM10_ESM.pdf [file 12870_2021_3371_MOESM10_ESM.pdf]
